# Supplementary material
Source: Research Square preprint supplement (doi:10.21203/rs.3.rs-10140124/v1)
Supplement: Supplementary file 1 [file 98b8ba0304a6b7e410be43df.docx]

**Study Title:** **“The Cost of Oral Diseases: Economic Burden, Barriers to Care, and Opportunities for Health Systemic Reforms in Rural Lucknow”**

**SECTION 1: DEMOGRAPHIC INFORMATION**

1. **Participant Code:** ____________________ 2. **Gender:** ☐ Male ☐ Female ☐ Other
2. **Age (completed years):** ________ 4. **Marital status:** ☐ Single ☐ Married ☐ Widowed ☐ Divorced
3. **Education level:** ☐ No formal schooling ☐ Primary school (up to Class V) ☐ Secondary school (Class VI–X) ☐ Higher secondary and above
4. **Occupation:** ☐ Unemployed ☐ Daily wage laborer ☐ Farmer ☐ Salaried employee ☐ Self-employed ☐ Homemaker
5. **Monthly household income:** ☐ Less than ₹5,000 ☐ ₹5,001–₹10,000 ☐ ₹10,001–₹20,000
   ☐ More than ₹20,000
6. **Do you or your family have any health insurance covering dental treatment?**
   ☐ Yes (e.g., Ayushman Bharat / Private insurance) ☐ No
7. **Tobacco and alcohol use:**

| **Habits** | **Type** | **Duration** | **Frequency** |
| --- | --- | --- | --- |
| Smokeless form of tobacco | ☐ Khaini ☐ Gutka ☐ Pan ☐ Pan masala ☐ Snuff ☐ Gul manjan ☐ Other |  |  |
| Smoking form of tobacco | ☐ Bidi ☐ Cigarette ☐ Hookah ☐ Cigar ☐ Other |  |  |
| Alcohol |  |  |  |

**SECTION 2: ORAL HEALTH PRACTICES, NEEDS & SERVICE UTILIZATION**

1. **How often do you brush your teeth?** ☐ Once daily ☐ Twice daily ☐ Sometimes ☐ Never
2. **When was your last visit to a dentist, for any dental problem or routine check-up?**
   ☐ Within the past 6 months ☐ 6 months–1 year ago ☐ More than 1 year ago ☐ Never visited a dentist
3. **What was the main reason for your last dental visit?** *(Tick all that apply)*
   ☐ Routine check-up ☐ Pain/emergency treatment ☐ Cleaning/scaling ☐ Extraction or filling ☐ Consultation only ☐ Never visited a dentist
4. **When you have tooth pain, do you use medicines or home remedies before visiting a dentist?** ☐ Yes ☐ No
5. **Do you currently experience any dental pain or discomfort?** ☐ Yes ☐ No
6. **Do you experience bleeding gums while brushing or eating?** ☐ Never ☐ Sometimes ☐ Often
7. **Have you lost any teeth due to decay or gum disease?** ☐ Yes ☐ No
8. **When you experience a dental problem, which healthcare facility do you usually visit first for treatment?** ☐ Government hospital ☐ HWC (Health & Wellness Centre)/PHC (Primary Health Centre)/CHC (Community Health Centre)/SC (Subcentre) ☐ Private dental clinic ☐ Do not seek treatment
9. **Is there a dental clinic or hospital available near your home?** ☐ Yes, within 5 km ☐ Yes, more than 5 km ☐ No

**SECTION 3: ECONOMIC BURDEN ASSESSMENT**

1. **Approximately how much did you spend on your last dental treatment (including consultation, medication, procedures)?** ☐ ₹0 ☐ ₹1–₹500 ☐ ₹501–₹2,000 ☐ ₹2,001–₹5,000 ☐ More than ₹5,000
2. **Did your dental expenses affect your household budget?** ☐ No impact ☐ Minor impact ☐ Major impact
3. **Have you ever missed work or daily activities due to oral health problems?** ☐ Yes, frequently ☐ Yes, occasionally ☐ No
4. **Have you ever postponed or avoided dental treatment due to financial reasons?**
   ☐ Yes ☐ No
5. **If you need urgent dental treatment today, how would you manage the expenses?**
   ☐ Personal savings ☐ Borrow from family/friends ☐ Loan from money lender
   ☐ Would not seek treatment due to cost

**SECTION 4: BARRIERS TO ACCESSING DENTAL CARE**

1. **What are the main reasons you avoid or delay visiting a dentist?** *(Tick all that apply)*
   ☐ High cost of treatment ☐ Fear of dental procedures ☐ Long distance to clinic
   ☐ Lack of awareness ☐ No significant dental problem
2. **How affordable do you feel dental treatment is in your area?**
   ☐ Affordable ☐ Somewhat affordable ☐ Not affordable
3. **If dental services were provided at a lower cost or free of charge, would you visit a dentist more often?** ☐ Yes ☐ No ☐ Maybe
4. **Have you ever faced difficulty in reaching a dental clinic due to lack of transport?**
   ☐ Yes ☐ No
5. **Do you feel that dental services (government/private) are adequate to meet the community’s needs?** ☐ Yes ☐ No
6. **How would you rate the quality of dental services in government facilities?**
   ☐ Satisfactory ☐ Not satisfactory ☐ Don’t know / Never used
7. **Are there any specific challenges faced by women or children in accessing dental care?**
   ☐ Yes ☐ No
   If yes, please specify: _______________________
