# Supplementary material
Source: Research Square preprint supplement (doi:10.21203/rs.3.rs-10140124/v1)
Supplement: Supplementary file 2 [file ecd54c4f381e18fd85b87bf0.docx]

**Focus Group Discussion -**5 A's Framework Interview Guide

| Themes | Questions |
| --- | --- |
| **1. Accessibility** | **Q1. What are the biggest challenges in reaching a dentist or dental clinic in your area?**  **Probes:**   - How far do you have to travel to get dental care? - Are transport facilities available and affordable for seeking dental treatment? - Are there specific groups (children, elderly, pregnant women) who face more difficulties in accessing care? - Would mobile dental clinics or outreach programs help? Why or why not?   **Q2. What solutions do you think can make dental care more accessible?**  **Probes:**   - Would having a dental unit at every PHC (Primary Health Center) be helpful? - How effective would home-based or community-based oral health check-ups be? - Would training local health workers to provide basic dental care help? |
| **2. Affordability** | **Q3. What do you think about the cost of dental treatment in both government and private clinics?**  **Probes:**   - Are government dental services really affordable, or do people still have to pay high costs for treatment or medicines? - How do financial issues affect decisions about seeking dental care? - Are people aware of any schemes or subsidies for dental treatment?   **Q4. What policies or programs would help make dental care more affordable?**  **Probes:**   - Should there be free/subsidized treatment for low-income families? - Would a government-sponsored dental insurance scheme help? - Should there be price regulations for private dental clinics? - Should the government provide free basic dental kits (toothpaste, toothbrush, fluoride) to rural households? |
| **3. Availability** | **Q5. Do you think there are enough dentists and dental facilities in your area?**  **Probes:**   - Do government hospitals provide regular dental services? - Are there any specialists (orthodontists, prosthodontists) available, or only general dentists? - How often do dental camps or check-ups happen?   **Q6. How can dental services be improved to better serve the rural population?**  **Probes:**   - Should every PHC/CHC have a dedicated dentist? - Would it help if dentists visited villages regularly instead of patients traveling long distances? - How can technology (tele-dentistry, online consultations) improve access? |
| **4. Accommodation** | **Q7. Are government dental services convenient in terms of timings and availability?**  **Probes:**   - Do government dental clinics have fixed hours that make it difficult for working people to visit? - Are dental services available during emergencies or outside regular working hours? - Do you feel that waiting times are reasonable at government dental facilities?   **Q8. What changes can make the system more patient-friendly?**  **Probes:**   - Should there be weekend or evening dental clinics for working individuals? - Would an appointment-based system improve efficiency? - How can services be adjusted to fit the needs of women, elderly, and disabled people? |
| **5. Acceptability** | **Q9. Do people in your community trust and feel comfortable with government dental services?**  **Probes:**   - What are the reasons for preferring or avoiding government dental care? - Are there myths or misconceptions that discourage people from seeking dental treatment? - Do people feel respected and well-treated by government dentists?   **Q10. How can government dental services be made more acceptable to the community?**  **Probes:**   - Should there be better awareness programs to educate people about the importance of oral health? - Would community engagement programs (e.g., involving local leaders, NGOs) help build trust? - Should dentists be trained in culturally sensitive communication to improve patient satisfaction? |
